# Supplementary material
Source: HighWire-hosted journal article supplement (https://fn.bmj.com/content/105/4/455.2)

# THE LANCET

## Infectious Diseases

### Supplementary appendix

This appendix formed part of the original submission and has been peer reviewed.  
We post it as supplied by the authors.

Supplement to: Favre G, Pomar L, Qi X, Nielsen-Saines K, Musso D, Baud D. Guidelines for pregnant women with suspected SARS-CoV-2 infection. *Lancet Infect Dis* 2020; published online March 3. [http://dx.doi.org/10.1016/S1473-3099\(20\)30157-2](http://dx.doi.org/10.1016/S1473-3099(20)30157-2).

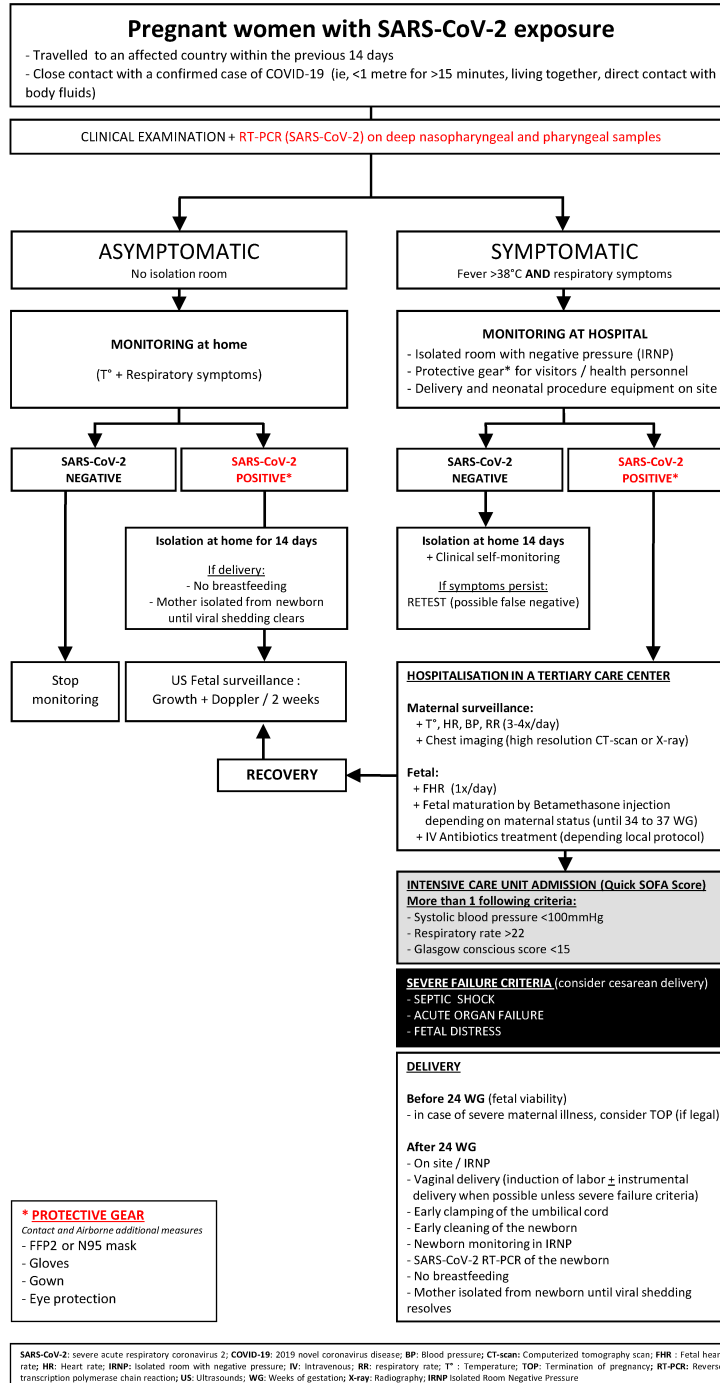

Supplement: inline-supplementary-material-1 [file inline-supplementary-material-1.pdf]
